# Supplementary material for: Racial and Ethnic Differences in Amyloid PET Positivity in Individuals With Mild Cognitive Impairment or Dementia: A Secondary Analysis of the Imaging Dementia–Evidence for Amyloid Scanning (IDEAS) Cohort Study
Source: PubMed Central journal article supplement (PMC9531087; doi:10.1001/jamaneurol.2022.3157), 2022-10-03
Supplement: jamaneurol-e223157-s001.pdf [file jamaneurol-e223157-s001.pdf]

1  
2  
3  
4  
5  
6  
7  
8  
9  
10  
11  
12  
13  
14  
15  
16

## Supplemental Online Content

Wilkins CH, Windon CC, Dilworth-Anderson P, et al. Racial and ethnic differences in amyloid PET positivity in individuals with mild cognitive impairment or dementia: a secondary analysis of the Imaging Dementia–Evidence for Amyloid Scanning (IDEAS) cohort study. *JAMA Neurol.* Published online October 3, 2022. doi:10.1001/jamaneurol.2022.3157

- eMethods**
- eResults**
- eReferences**

This supplemental material has been provided by the authors to give readers additional information about their work.

17 **eMethods**

18

19 *Inclusion and Exclusion Criteria in IDEAS*

20 The inclusion criteria for the IDEAS study included: 1) 65 and older; 2) Medicare beneficiary with  
21 Medicare as primary insurance; 3) Diagnosis of MCI or dementia, according to DSM-IV and/or  
22 National Institutes of Aging-Alzheimer's Association criteria, verified by a dementia specialist  
23 within 24 months<sup>1-3</sup>; 4) Meets Appropriate use criteria (Cognitive complaint with objectively  
24 confirmed impairment; The etiologic cause of cognitive impairment is uncertain after a  
25 comprehensive evaluation by a dementia specialist, including general medical and neurological  
26 examination, mental status testing including standard measures of cognitive impairment,  
27 laboratory testing, and structural neuroimaging as below; Alzheimer's disease is a diagnostic  
28 consideration; Knowledge of amyloid PET status is expected to alter diagnosis and  
29 management.); 5) Head MRI and/or CT within 24 months prior to enrollment; 6) Clinical  
30 laboratory assessment (complete blood count [CBC], standard blood chemistry profile, thyroid  
31 stimulating hormone [TSH], vitamin B12) within the 12 months prior to enrollment; 7) Able to  
32 tolerate amyloid PET required by protocol, to be performed at a participating PET facility; 8)  
33 English or Spanish speaking (for the purposes of informed consent); 9) Willing and able to  
34 provide consent. Consent may be by proxy.

35 Exclusion criteria for IDEAS included: 1) Normal cognition or subjective complaints that are not  
36 verified by cognitive testing; 2) Knowledge of amyloid status, in the opinion of the referring  
37 dementia expert, may cause significant psychological harm or otherwise negatively impact the  
38 patient or family; 3) Amyloid status already known to patient or referring clinician based on prior  
39 amyloid imaging or cerebrospinal fluid analysis; 4) Current or previous enrollment in an anti-  
40 amyloid therapeutic trial; 5) Scan is being ordered solely based on a family history of dementia,  
41 presence of apolipoprotein E (APOE) 4, or in lieu of genotyping for suspected autosomal  
42 mutation carriers; 6) Scan being ordered for nonmedical purposes (e.g., legal, insurance  
43 coverage, or employment screening); 7) Cancer requiring active therapy (excluding non-

44 melanoma skin cancer); 8) Hip/pelvic fracture within the 12 months prior to enrollment; 9) Body  
45 weight exceeds PET scanner weight limit; 10) Life expectancy less than 24 months based on  
46 medical co-morbidities; 11) Residence in a skilled nursing facility.

47 ([https://cdn.jamanetwork.com/ama/content\\_public/journal/jama/937922/joi190021supp1\\_prod.pdf?Expires=1659472364&Signature=WjHQR89YuHwGKKecqwqX5cl8h~fF0O0cTUcmhm3T9KJYHweyQqPaxRrV0n66VJjVeTEJ-BvemHRvoCTh8qlz~bt4pgp4PSUVnF3nBKRHTx4ciXbimeaSBaWTngFGPiwEvlb5dSDil4dHFfNwctlygtPnLAnDBiS6vKFw4si1Qo~3OSeQHv5z6honakNNYbTr9O1h3qYDjiYJpyT1wY3wU-b4xEIDEDf9kNubb9GQ3HKXy53VCYVGyD5St7qBNhnx0Ju5rbNxaIw7pePLRAwVLTOQFOKnJpGUZXPOzmrChDXAoSWwmqSpFfkZ6H8ZAUxjD2NysW15zvOUotKSKMmiOw &Key-Pair-Id=APKAIE5G5CRDK6RD3PGA](https://cdn.jamanetwork.com/ama/content_public/journal/jama/937922/joi190021supp1_prod.pdf?Expires=1659472364&Signature=WjHQR89YuHwGKKecqwqX5cl8h~fF0O0cTUcmhm3T9KJYHweyQqPaxRrV0n66VJjVeTEJ-BvemHRvoCTh8qlz~bt4pgp4PSUVnF3nBKRHTx4ciXbimeaSBaWTngFGPiwEvlb5dSDil4dHFfNwctlygtPnLAnDBiS6vKFw4si1Qo~3OSeQHv5z6honakNNYbTr9O1h3qYDjiYJpyT1wY3wU-b4xEIDEDf9kNubb9GQ3HKXy53VCYVGyD5St7qBNhnx0Ju5rbNxaIw7pePLRAwVLTOQFOKnJpGUZXPOzmrChDXAoSWwmqSpFfkZ6H8ZAUxjD2NysW15zvOUotKSKMmiOw &Key-Pair-Id=APKAIE5G5CRDK6RD3PGA)).

#### 56 *Race and Ethnicity Reporting in IDEAS*

57 In IDEAS, race and ethnicity of participants was recorded by dementia specialists into a  
58 minimum of 1 race category (American Indian, Alaskan Native, Asian, Black or African  
59 American, Native Hawaiian or Pacific Islander, White, Not reported, Unknown) and a minimum  
60 of 1 ethnicity category (Hispanic or Latino, not Hispanic or Latino, not reported, unknown).  
61 Dementia specialists were not given instruction by the study protocol or registration form on how  
62 race and ethnicity were to be determined<sup>4</sup>, therefore, we do not if or which participants were  
63 directly asked to self-identify race and ethnicity.

#### 65 *Amyloid PET Scan Interpretation and Communication of Results in IDEAS*

66 In the IDEAS study, amyloid PET scans were interpreted by radiologists or nuclear medicine  
67 physicians at respective PET facilities that agreed to participate in the IDEAS study. Each  
68 radiologist or nuclear medicine physician provided a dichotomized interpretation of the amyloid  
69 PET scan (positive or negative). All radiologists and nuclear medicine physicians who  
70 participated in the interpretation of PET scans had completed vendor-provided online or in-  
71 person training courses specific to the amyloid imaging agent(s) used at his or her PET facility.  
72 Amyloid PET scan reads were then uploaded to the IDEAS database within 7 days of

73 completing the PET scan read. Additional information regarding PET scan interpretation and  
74 report submission can be found in the original protocol

75  
76 ([https://cdn.jamanetwork.com/ama/content\\_public/journal/jama/937922/joi190021supp1\\_prod.pdf?Expires=1659472364&Signature=WjHQR89YuHwGKKecqwqX5cl8h~fF0O0cTUcmhm3T9KJYHweyQqPaxRrV0n66VJjVeTEJ-BvemHRvoCTh8glz~bt4pgp4PSUVnF3nBKRHTx4ciXbimeaSBaWTngFGPiwEvlb5dSDil4dHFfNwctlygtPnLAnDBiS6vKfw4si1Qo~3OSeQHv5z6honakNNYbTr9O1h3qYDjiYJpyT1wY3wU-b4xEIDEDf9kNubb9GQ3HKXy53VCYVGyD5St7gBNhnx0Ju5rbNxaW7pePLRAwVLTOQFOKnJpGUZXPOzmrChDXAoSWwmqSpFfkZ6H8ZAUxjD2NysW15zvOUotKSKMmiOw\\_&Key-Pair-Id=APKAIE5G5CRDK6RD3PGA](https://cdn.jamanetwork.com/ama/content_public/journal/jama/937922/joi190021supp1_prod.pdf?Expires=1659472364&Signature=WjHQR89YuHwGKKecqwqX5cl8h~fF0O0cTUcmhm3T9KJYHweyQqPaxRrV0n66VJjVeTEJ-BvemHRvoCTh8glz~bt4pgp4PSUVnF3nBKRHTx4ciXbimeaSBaWTngFGPiwEvlb5dSDil4dHFfNwctlygtPnLAnDBiS6vKfw4si1Qo~3OSeQHv5z6honakNNYbTr9O1h3qYDjiYJpyT1wY3wU-b4xEIDEDf9kNubb9GQ3HKXy53VCYVGyD5St7gBNhnx0Ju5rbNxaW7pePLRAwVLTOQFOKnJpGUZXPOzmrChDXAoSWwmqSpFfkZ6H8ZAUxjD2NysW15zvOUotKSKMmiOw_&Key-Pair-Id=APKAIE5G5CRDK6RD3PGA)).

### 85 *Optimal Matching Strategy*

86 To compare the amyloid PET positivity rate between racial and ethnic minority groups and  
87 White participants, optimal 1:1 matching (Black to White, Hispanic to White, Asian to White; all 3  
88 White groups unique) to obtain minimal distances between matches using network flow  
89 optimization methods<sup>5-7</sup> created balanced groups with respect to their baseline characteristics.  
90 Variables used for matching were recorded in case report forms at IDEAS study entry and  
91 included age (matching within  $\pm 3$  years), sex, highest level of education attained, living  
92 arrangement (with whom do you reside; coded into alone/not alone for purposes of analyses),  
93 history of hypertension, history of diabetes, family history of dementia, and level of impairment  
94 (MCI or dementia).

95

96

97 **eResults**

98 Because higher percentages of Black, Hispanic/Latinx and Asian patients had vascular disease  
 99 risk factors (e.g., diabetes) and were more likely to have dementia (vs MCI) relative to White  
 100 patients, we examined whether there were differences in ADRD subtype across racial and  
 101 ethnic categories. Past medical history of stroke, TIA, and CVD were similar across racial and  
 102 ethnic groups (Supplemental Table 5). Pre-PET diagnosis of vascular cognitive impairment was  
 103 similar across the groups, however, pre-PET diagnosis of mixed AD pathology was higher  
 104 among Black (15.75%) and Hispanic (13.15%) participants compared to White (10.78%) and  
 105 Asian (10.28%) (Supplemental Table 6). No additional imaging data is available to examine  
 106 cerebrovascular disease.

107

108

109

110 **Supplemental Table 1 – Recoding Separate IDEAS Race and Ethnicity Questions**

| IDEAS race and ethnicity questions                                                                                                                      |                                                  | Race and Ethnicity used for the analysis |
|---------------------------------------------------------------------------------------------------------------------------------------------------------|--------------------------------------------------|------------------------------------------|
| Race (Select all that apply)                                                                                                                            | Hispanic origin                                  |                                          |
| White only                                                                                                                                              | Not Hispanic or Latino, Not reported, or Unknown | White                                    |
| Black or African American only                                                                                                                          | Not Hispanic or Latino, Not reported, or Unknown | Black                                    |
| Asian only                                                                                                                                              | Not Hispanic or Latino, Not reported, or Unknown | Asian                                    |
| Only one of <ul style="list-style-type: none"> <li>• American Indian</li> <li>• Alaska Native</li> <li>• Native Hawaiian or Pacific Islander</li> </ul> | Not Hispanic or Latino, Not reported, or Unknown | Indigenous                               |

|                                                                                                                                                                                                                                                                                   |                                                  |                         |
|-----------------------------------------------------------------------------------------------------------------------------------------------------------------------------------------------------------------------------------------------------------------------------------|--------------------------------------------------|-------------------------|
| <p>Only one of:</p> <ul style="list-style-type: none"> <li>• White</li> <li>• Black or African American</li> <li>• Asian</li> <li>• American Indian</li> <li>• Alaska Native</li> <li>• Native Hawaiian or Pacific Islander</li> <li>• Not reported</li> <li>• Unknown</li> </ul> | Hispanic or Latino                               | Hispanic                |
| <p>More than one of:</p> <ul style="list-style-type: none"> <li>• White</li> <li>• Black or African American</li> <li>• Asian</li> <li>• American Indian</li> <li>• Alaska Native</li> <li>• Native Hawaiian or Pacific Islander</li> </ul>                                       | Any ethnicity                                    | Multiracial             |
| Not reported or Unknown                                                                                                                                                                                                                                                           | Not Hispanic or Latino, Not reported, or Unknown | Not reported or Unknown |

111  
112  
113

114 **Supplemental Table 2 - Results From Optimal 1:1 Matching**  
 115

| Variable                                     | Matched participants |                  | Matched participants |                  | Matched participants |                  |
|----------------------------------------------|----------------------|------------------|----------------------|------------------|----------------------|------------------|
|                                              | Asian<br>(n=313)     | White<br>(n=313) | Black<br>(n=615)     | White<br>(n=615) | Hispanic<br>(n=780)  | White<br>(n=780) |
| Age, median (range), years                   | 76 (65-91)           | 76 (65-91)       | 75 (65-95)           | 75 (65-93)       | 76 (65-93)           | 76 (65-92)       |
| Sex, No. (%)                                 |                      |                  |                      |                  |                      |                  |
| Male                                         | 150 (47.9)           | 150 (47.9)       | 226 (36.7)           | 226 (36.7)       | 303 (38.8)           | 303 (38.8)       |
| Female                                       | 163 (52.1)           | 163 (52.1)       | 389 (63.3)           | 389 (63.3)       | 477 (61.2)           | 477 (61.2)       |
| Education, No. (%)                           |                      |                  |                      |                  |                      |                  |
| Less than high school                        | 40 (12.8)            | 40 (12.8)        | 101 (16.4)           | 101 (16.4)       | 279 (35.8)           | 279 (35.8)       |
| High school (including equivalency)          | 62 (19.8)            | 62 (19.8)        | 215 (35.0)           | 215 (35.0)       | 201 (25.8)           | 201 (25.8)       |
| Some college or associate degree             | 40 (12.8)            | 40 (12.8)        | 129 (21.0)           | 129 (21.0)       | 149 (19.1)           | 149 (19.1)       |
| Bachelor's degree                            | 98 (31.3)            | 98 (31.3)        | 88 (14.3)            | 88 (14.3)        | 74 (9.5)             | 74 (9.5)         |
| Master's degree                              | 29 (9.3)             | 29 (9.3)         | 55 (8.9)             | 55 (8.9)         | 42 (5.4)             | 42 (5.4)         |
| Doctorate                                    | 44 (14.1)            | 44 (14.1)        | 27 (4.4)             | 27 (4.4)         | 35 (4.5)             | 35 (4.5)         |
| Living arrangement, No. (%)                  |                      |                  |                      |                  |                      |                  |
| Patient lives alone                          | 35 (11.2)            | 35 (11.2)        | 146 (23.7)           | 146 (23.7)       | 115 (14.7)           | 115 (14.7)       |
| Patient lives with at least one other person | 278 (88.8)           | 278 (88.8)       | 469 (76.3)           | 469 (76.3)       | 665 (85.3)           | 665 (85.3)       |
| History of hypertension, No. (%)             |                      |                  |                      |                  |                      |                  |
| No                                           | 169 (54.0)           | 169 (54.0)       | 193 (31.4)           | 193 (31.4)       | 351 (45.0)           | 351 (45.0)       |

|                                     |            |            |            |            |            |            |
|-------------------------------------|------------|------------|------------|------------|------------|------------|
| Yes                                 | 144 (46.0) | 144 (46.0) | 422 (68.6) | 422 (68.6) | 429 (55.0) | 429 (55.0) |
| History of diabetes, No. (%)        |            |            |            |            |            |            |
| No                                  | 240 (76.7) | 240 (76.7) | 448 (72.8) | 448 (72.8) | 595 (76.3) | 595 (76.3) |
| Yes                                 | 73 (23.3)  | 73 (23.3)  | 167 (27.2) | 167 (27.2) | 185 (23.7) | 185 (23.7) |
| Family history of dementia, No. (%) |            |            |            |            |            |            |
| No                                  | 273 (87.2) | 273 (87.2) | 516 (83.9) | 516 (83.9) | 647 (82.9) | 647 (82.9) |
| Yes                                 | 40 (12.8)  | 40 (12.8)  | 99 (16.1)  | 99 (16.1)  | 133 (17.1) | 133 (17.1) |
| Impairment level, No. (%)           |            |            |            |            |            |            |
| MCI                                 | 168 (53.7) | 168 (53.7) | 302 (49.1) | 302 (49.1) | 356 (45.6) | 356 (45.6) |
| Dementia                            | 145 (46.3) | 145 (46.3) | 313 (50.9) | 313 (50.9) | 424 (54.4) | 424 (54.4) |

116 MCI = mild cognitive impairment  
117  
118



119  
120  
121

**Supplemental Table 3 – Race and ethnicity of participants that did not have an amyloid PET scan performed**

|                            | <b>Eligible<br/>(N=21,630)</b> | <b>Amyloid PET<br/>scan not<br/>performed<br/>(N=3,337)</b> |
|----------------------------|--------------------------------|-------------------------------------------------------------|
| <b>Race or Ethnicity</b>   | <b>N</b>                       | <b>N (%)</b>                                                |
| Asian                      | 394                            | 73 (18.5)                                                   |
| Black                      | 806                            | 169 (21.0)                                                  |
| Hispanic                   | 1,119                          | 290 (25.9)                                                  |
| White                      | 17,801                         | 2,452 (13.8)                                                |
| Other                      | 41                             | 9 (22.0)                                                    |
| Multiracial                | 37                             | 6 (16.2)                                                    |
| Not reported or<br>Unknown | 1,432                          | 338 (23.6)                                                  |

122  
123

Note: Percentages are out of the number of participants in each race or ethnicity that are eligible.

124 **Supplemental Table 4 – Race/Ethnicity of participants that did not have an amyloid PET scan performed by**  
 125 **highest level of education**

| Education                           | Race and Ethnicity |             |             |               |           |             |                         | Total         |
|-------------------------------------|--------------------|-------------|-------------|---------------|-----------|-------------|-------------------------|---------------|
|                                     | Asian              | Black       | Hispanic    | White         | Other     | Multiracial | Not reported or Unknown |               |
| Less than high school               | 9 (12.3)           | 21 (12.4)   | 102 (35.2)  | 130 (5.3)     | 0 (0.0)   | 1 (16.7)    | 49 (14.5)               | 312 (9.3)     |
| High school (including equivalency) | 10 (13.7)          | 56 (33.1)   | 86 (29.7)   | 679 (27.7)    | 2 (22.2)  | 2 (33.3)    | 88 (26.0)               | 923 (27.7)    |
| Some college or associate degree    | 13 (17.8)          | 44 (26.0)   | 37 (12.8)   | 614 (25.0)    | 3 (33.3)  | 2 (33.3)    | 62 (18.3)               | 775 (23.2)    |
| Bachelor's degree                   | 15 (20.5)          | 18 (10.7)   | 20 (6.9)    | 415 (16.9)    | 2 (22.2)  | 0 (0.0)     | 50 (14.8)               | 520 (15.6)    |
| Master's degree                     | 5 (6.8)            | 9 (5.3)     | 4 (1.4)     | 185 (7.5)     | 0 (0.0)   | 0 (0.0)     | 24 (7.1)                | 227 (6.8)     |
| Doctorate                           | 10 (13.7)          | 4 (2.4)     | 6 (2.1)     | 111 (4.5)     | 1 (11.1)  | 0 (0.0)     | 12 (3.6)                | 144 (4.3)     |
| Missing                             | 11 (15.1)          | 17 (10.1)   | 35 (12.1)   | 318 (13.0)    | 1 (11.1)  | 1 (16.7)    | 53 (15.7)               | 436 (13.1)    |
| Total                               | 73 (100.0)         | 169 (100.0) | 290 (100.0) | 2,452 (100.0) | 9 (100.0) | 6 (100.0)   | 338 (100.0)             | 3,337 (100.0) |

126 Note: Percentages are column percentages

127

128 **Supplemental Table 5 – Select past/current medical history variables by race and**  
 129 **ethnicity**

130  
 131

| Variable                               | Race and Ethnicity  |                            |                                      |                  |
|----------------------------------------|---------------------|----------------------------|--------------------------------------|------------------|
|                                        | White<br>(n=15,322) | Hispanic/Latino<br>(n=829) | Black/African<br>American<br>(n=635) | Asian<br>(n=321) |
| History of stroke or TIA, No. (%)      | 1,606 (10.5)        | 75 (9.0)                   | 67 (10.6)                            | 31 (9.7)         |
| History of CVD without stroke, No. (%) | 794 (5.2)           | 56 (6.8)                   | 35 (5.5)                             | 16 (5.0)         |
| Total                                  | 2,400 (15.7)        | 131 (15.8)                 | 102 (16.1)                           | 47 (14.7)        |

132  
 133

134 **Supplemental Table 6 Primary pre-PET differential diagnosis by race and ethnicity**

135

| Pre-PET primary differential diagnosis | Race and Ethnicity |                           |                 |        |
|----------------------------------------|--------------------|---------------------------|-----------------|--------|
|                                        | Asian              | Black/African<br>American | Hispanic/Latino | White  |
| Vascular cognitive impairment          | 19                 | 37                        | 45              | 839    |
|                                        | 5.92%              | 5.83%                     | 5.43%           | 5.48%  |
| AD, mixed pathology                    | 33                 | 100                       | 109             | 1,652  |
|                                        | 10.28%             | 15.75%                    | 13.15%          | 10.78% |

136  
 137  
 138

139 **eReferences**

140 1. American Psychiatric Association. (2000). *Diagnostic and statistical manual of mental*  
141 *disorders* (4th ed., text rev.).

142 2. McKhann GM, Knopman DS, Chertkow H, et al. The diagnosis of dementia due to  
143 Alzheimer's disease: recommendations from the National Institute on Aging-Alzheimer's  
144 Association workgroups on diagnostic guidelines for Alzheimer's disease. *Alzheimers*  
145 *Dement.* 2011;7(3):263-269. doi:10.1016/j.jalz.2011.03.005

146 3. Albert MS, DeKosky ST, Dickson D, et al. The diagnosis of mild cognitive impairment  
147 due to Alzheimer's disease: recommendations from the National Institute on Aging-  
148 Alzheimer's Association workgroups on diagnostic guidelines for Alzheimer's disease.  
149 *Alzheimers Dement.* 2011;7(3):270-279. doi:10.1016/j.jalz.2011.03.008

150 4. Rabinovici GD, Gatsonis C, Apgar C, et al. Association of Amyloid Positron Emission  
151 Tomography With Subsequent Change in Clinical Management Among Medicare  
152 Beneficiaries With Mild Cognitive Impairment or Dementia. *JAMA.* 2019;321(13):1286-  
153 1294. doi:10.1001/jama.2019.2000

154 5. Rosenbaum P. Optimal Matching for Observational Studies. *Journal of the American*  
155 *Statistical Association.* 1989; 84(408): 1024-1032.

156 6. Carre, B. (1979), *Graphs and Networks*, New York: Oxford University  
157 Press

158 7. Ford, L., and Fulkerson, D. (1962), *Flows in Networks*, Princeton, NJ:  
159 Princeton University Press  
160
